# Supplementary material
Source: publisher site journal article supplement (https://bdj.pensoft.net/lib/ajax_srv/article_elements_srv.php?action=download_suppl_file&instance_id=3309656)
Supplement: Supplementary file 1 [file article_elements_srv.php]

* Automation for b
*  return list r()
*  ereturn list e()
*  c(), s(), n()

* Output file payout 2007+2008+2009+2010:
*  file.matrix: all baby kid adult midage elder veld
*    row names: cost los death icu ae
*    col names: _b(como1) _se(como1) _b(como2) _se(como2)... _b(como32) _se(como32)
*  each matrix(r*c)=(5*96)

* y= 2007, 2008, 2009, 2010, all {
* ili_inoutpt_a 0 999 all `z'
* ili_inoutpt 0 15 a0_15 `z'
* ili_inoutpt 15 65 a15_65 `z'
* ili_inoutpt 65 999 a65up `z'
* }

* args minage maxage agegrp
* keep if age >= `minage' & age<`maxage'

cd "/Users/RJCC/Documents/rjcc3/ili"
include _init
include _indata

import excel "/Users/RJCC/Documents/rjcc3/ili/como_list.xls", sheet("como") ///
       firstrow case(lower) clear
forvalues i=1(1)47 {
	scalar c`i'=como[`i']
}

program rn
rename (asth2 allrh2 atopd2 cong2 tb2 cancer2 dm2 hlipid2 thyr2 ///
        chf2 vhd2 cad2 heart2 rhy2 htn2 ///
	    cva2 demen2 epil2 paod2 copd2 pulcer2 vhepa2 cirr2 hcc2 ///
		renal2 esrd2 preg2 gout2 flu2 transplant2 hiv2 sle2 rha2 aks2 ///
		alle2 cv2 cvc2 card2 neuro2 vas2 lung2 gi2 ///
		kidney2 meta2 endoc2 autoim2 imdef2) ///
       (c1 c2 c3 c4 c5 c6 c7 c8 c9 c10 c11 c12 c13 c14 c15 c16 ///
	    c17 c18 c19 c20 c21 c22 c23 c24 c25 c26 c27 c28 c29 c30 ///
	    c31 c32 c33 c34 c35 c36 c37 c38 c39 c40 c41 c42 c43 c44 ///
	    c45 c46 c47)
end

program rn2
rename (c1 c2 c3 c4 c5 c6 c7 c8 c9 c10 c11 c12 c13 c14 c15 c16 ///
	   c17 c18 c19 c20 c21 c22 c23 c24 c25 c26 c27 c28 c29 c30 ///
	   c31 c32 c33 c34 c35 c36 c37 c38 c39 c40 c41 c42 c43 c44 ///
	   c45 c46 c47) ///
	   (asth allrh atopd cong tb cancer dm hlipid thyr ///
	    chf vhd cad heart rhy htn ///
	    cva demen epil paod copd pulcer vhepa cirr hcc ///
	    renal esrd preg gout flu transplant hiv sle rha aks ///
	    alle cv cvc card neuro vas lung gi ///
	    kidney meta endoc autoim imdef)
end

program ilc
args minage maxage agegrp z
indata `z'
rn
keep if age >= `minage' & age<`maxage'
* cost, los => ln(cost), ln(los) in _indata.do
tab c1, matcell(C1)
matrix P_`agegrp' = (`minage', `maxage', 100*C1[2,1]/(C1[1,1]+C1[2,1]))
matrix coln P_`agegrp'= minage maxage c1
reg bcost sex2 c1
matrix COST =  (`minage', `maxage', exp(_b[c1]), exp(_b[c1]-1.96*_se[c1]), exp(_b[c1]+1.96*_se[c1]))
matrix coln COST= minage maxage c1 c1_L c1_H

reg blos sex2 c1
matrix LOS =  (`minage', `maxage', exp(_b[c1]), exp(_b[c1]-1.96*_se[c1]), exp(_b[c1]+1.96*_se[c1]))

reg bdaycost sex2 c1
matrix DAYCOST =  (`minage', `maxage', exp(_b[c1]), exp(_b[c1]-1.96*_se[c1]), exp(_b[c1]+1.96*_se[c1]))

distinct die2
if r(ndistinct)>1 {
logit die2 sex2 c1, or
matrix DIE =  (`minage', `maxage', exp(_b[c1]), exp(_b[c1]-1.96*_se[c1]), exp(_b[c1]+1.96*_se[c1]))
}
else matrix DIE = (`minage', `maxage', 0,0,0)
distinct icu
if r(ndistinct)>1 {
logit icu sex2 c1, or
matrix ICU = (`minage', `maxage', exp(_b[c1]), exp(_b[c1]-1.96*_se[c1]), exp(_b[c1]+1.96*_se[c1]))
}
else matrix ICU = (`minage', `maxage', 0,0,0)
distinct ae
if r(ndistinct)>1 {
logit ae sex2 c1, or
matrix AE = (`minage', `maxage', exp(_b[c1]), exp(_b[c1]-1.96*_se[c1]), exp(_b[c1]+1.96*_se[c1]))
}
else matrix AE = (`minage', `maxage',0,0,0)
forvalues i= 2(1) 47 {
    tab c`i', matcell(C`i')
    matrix Pa_`agegrp' = (100*C`i'[2,1]/(C`i'[1,1]+C`i'[2,1]))
    matrix coln Pa_`agegrp'= c`i'
    matrix P_`agegrp' = P_`agegrp', Pa_`agegrp'
	reg bcost sex2 c`i'
	matrix COSTa = (exp(_b[c`i']), exp(_b[c`i']-1.96*_se[c`i']), exp(_b[c`i']+1.96*_se[c`i']))
	matrix coln COSTa= c`i' c`i'_L c`i'_H
	matrix COST = COST, COSTa
	reg blos sex2 c`i'
	matrix LOS = LOS, (exp(_b[c`i']), exp(_b[c`i']-1.96*_se[c`i']), exp(_b[c`i']+1.96*_se[c`i']))
	reg bdaycost sex2 c`i'
	matrix DAYCOST = DAYCOST, (exp(_b[c`i']), exp(_b[c`i']-1.96*_se[c`i']), exp(_b[c`i']+1.96*_se[c`i']))
	distinct die2
	if r(ndistinct)>1 {
	   logit die2 sex2 c`i', or
	   matrix DIE = DIE, (exp(_b[c`i']), exp(_b[c`i']-1.96*_se[c`i']), exp(_b[c`i']+1.96*_se[c`i']))
	   }
	   else matrix DIE = DIE, (0,0,0)
	distinct icu
	if r(ndistinct)>1 {
	   logit icu sex2 c`i', or
	   matrix ICU = ICU, (exp(_b[c`i']), exp(_b[c`i']-1.96*_se[c`i']), exp(_b[c`i']+1.96*_se[c`i']))
	   }
	   else matrix ICU = ICU, (0,0,0)
	 distinct ae
	 if r(ndistinct)>1 {
	   logit ae sex2 c`i', or
	   matrix AE = AE, (exp(_b[c`i']), exp(_b[c`i']-1.96*_se[c`i']), exp(_b[c`i']+1.96*_se[c`i']))
	   }
	   else matrix AE = AE, (0,0,0)
}
matrix `agegrp'=COST\LOS\DAYCOST\DIE\ICU\AE
end

local year "2007 2008 2009 2010 all"
matrix drop _all
foreach z of local year {
ilc 0 999 all `z'
ilc 0 15 a0_15 `z'
ilc 15 65 a15_65 `z'
ilc 65 999 a65up `z'
clear

matrix PREV_`z'=P_all\P_a0_15\P_a15_65\P_a65up
svmat PREV_`z', names(col)
rn2
export excel using "ilc_crude", sheet("PREV_`z'") firstrow(variables) sheetmodify
matrix ili_como_`z'=all\a0_15\a15_65\a65up
clear
svmat ili_como_`z', names(col)
rn2
export excel using "ilc_crude", sheet("ili_como_`z'") firstrow(variables) sheetmodify
}

* exit, clear STATA
